# Supplementary material for: Indoor air quality in a training centre used for sports practice
Source: PeerJ. 2023 May 1;11:e15298. doi: 10.7717/peerj.15298 (PMC10158773; doi:10.7717/peerj.15298)
Supplement: Supplemental Information 1 [file peerj-11-15298-s001.xlsx]

## Sheet: Hoja1
					IM= Inside Morning		a: white element with button		c: Arduino element
							b: white element without element
DATE	TIME	IM Total Subjects	IM SUBjects	IM TRAINERS	IM CO2MEASUREMENT1	IM CO2MEASUREMENT2	IM CO2MEASUREMENT3	IM CO2MEASUREMENT4	IM MEDIAa.CO2	IM tªMEASUREMENT1	IM tªMEASUREMENT2	IM tªMEASUREMENT3	IM tªMEASUREMENT4	IM MEDIAa.tª	IM a.RHMEASUREMENT1	IM a.RHMEASUREMENT2	IM a.RHMEASUREMENT3	IM RHMEASUREMENT4	IM MEDIAa.RH	IM b.TVOCMEASUREMENT1	IM b.TVOCMEASUREMENT2	IM b.TVOCMEASUREMENT3	IM TVOCMEASUREMENT4	IM MEDIAb.TVOC	IM b.AQIMEASUREMENT1	IM b.AQIMEASUREMENT2	IM b.AQIMEASUREMENT3	IM AQIMEASUREMENT4	IM MEDIAb.AQI	IM b.COMEASUREMENT1	IM b.COMEASUREMENT2	IM b.COMEASUREMENT3	IM COMEASUREMENT4	IM MEDIAb.CO	IM b.CO2MEASUREMENT1	IM b.CO2MEASUREMENT2	IM b.CO2MEASUREMENT3	IM b.CO2MEASUREMENT4	IM MEDIAb.CO2	IM b.HCHOMEASUREMENT1	IM b.HCHOMEASUREMENT2	IM b.HCHOMEASUREMENT3	IM HCHOMEASUREMENT4	IM MEDIAb.HCHO	IM c.PM2.5MEASUREMENT1	IM c.PM2.5MEASUREMENT2	IM c.PM2.5MEASUREMENT3	IM c.PM2.5MEASUREMENT4	IM MEDIAc.PM2.5
2021-07-15	10:17:00	6	5	1	499	497	497	498	497.75	24.36	24.37	24.45	24.4	24.395	50.88	50.81	50.67	50.76	50.78	0.7	0.6	0.7	0.6	0.65	3	3	3	3	3	14	18	18	19	17.25	514	562	546	553	543.75	0.055	0.086	0.093	0.088	0.0805	9	9	10	11	9.75
2021-07-16	10:23:00	4	3	1	589	590	590	592	590.25	25.26	25.18	25.21	25.28	25.2325	49	48.84	48.42	48.2	48.615	0	0	0	0	0	1	1	2	2	1.5	2	2	2	2	2	514	521	517	522	518.5	0.003	0.003	0.003	0.003	0.003	13	12	12	12	12.25
2021-07-19	09:30:00	6	5	1	603	607	610	612	608	25.42	25.37	25.37	25.36	25.38	32.96	32.95	32.83	32.93	32.9175	0	0	0	0	0	2	2	2	2	2	2	2	2	2	2	475	506	513	512	501.5	0.003	0.003	0.003	0.003	0.003	13	11	12	15	12.75
2021-07-20	10:28:00	4	3	1	561	565	566	565	564.25	26.17	26.21	26.21	26.2	26.1975	38.17	37.8	37.69	37.78	37.86	0	0	0	0	0	2	2	2	2	2	2	2	2	2	2	514	517	514	513	514.5	0.003	0.003	0.003	0.003	0.003	23	23	21	21	22
2021-07-21	10:55:00	8	7	1	849	847	843	836	843.75	24.79	24.77	24.78	24.72	24.765	38.59	40.23	40.67	38.36	39.4625	1.2	1.3	1.1	1.2	1.2	3	6	3	4	4	58	58	58	58	58	690	697	711	721	704.75	0.064	0.067	0.079	0.092	0.0755	16	15	12	17	15
2021-07-22	10:48:00	10	9	1	739	740	742	744	741.25	25.13	25.23	25.1	25.17	25.1575	34.27	33.99	34.2	34.08	34.135	3.2	2.9	2.8	2.6	2.875	5	4	4	4	4.25	58	50	42	34	46	985	954	962	930	957.75	0.206	0.192	0.19	0.172	0.19	18	23	18	23	20.5
2021-07-23	10:45:00	5	4	1	645	645	645	645	645	24.98	24.99	25.01	25	24.995	33.41	33.53	33.27	33.38	33.3975	0	0	0	0	0	2	2	2	2	2	2	2	2	2	2	517	514	510	513	513.5	0.003	0.003	0.003	0.003	0.003	29	32	30	32	30.75
2021-07-26	09:35:00	6	5	1	526	520	519	513	519.5	25.2	25.18	25.08	24.99	25.1125	44.64	44.47	44.92	44.57	44.65	0.1	0.1	0.1	0.1	0.1	2	2	2	2	2	7	7	7	7	7	529	525	522	529	526.25	0.01	0.013	0.013	0.014	0.0125	5	4	5	5	4.75
2021-07-27	10:40:00	5	4	1	705	710	711	713	709.75	24.9	25	24.89	24.98	24.9425	52.17	52.85	52.73	52.75	52.625	0	0	0	0.1	0.025	2	2	2	2	2	2	2	2	2	2	506	507	513	514	510	0.003	0.007	0.01	0.011	0.00775	27	23	19	18	21.75
2021-07-28	10:30:00	5	4	1	693	692	689	688	690.5	24.94	24.92	24.92	24.9	24.92	38.61	38.67	38.64	38.62	38.635	0.2	0.2	0.1	0.1	0.15	2	2	2	2	2	3	4	5	6	4.5	518	515	517	514	516	0.01	0.01	0.009	0.011	0.01	10	9	10	10	9.75
2021-07-29	11:23:00	6	5	1	735	742	744	746	741.75	25.22	25.24	25.31	25.31	25.27	40.92	40.84	40.68	40.6	40.76	1.6	1.7	1.7	1.8	1.7	4	4	4	4	4	2	2	2	2	2	905	911	913	920	912.25	0.141	0.143	0.145	0.147	0.144	12	14	14	15	13.75
2021-08-02	09:55:00	3	2	1	554	553	555	559	555.25	24.77	24.83	24.83	24.81	24.81	31.02	30.94	30.99	31.02	30.9925	0.4	0.6	0.6	0.4	0.5	2	3	3	2	2.5	14	23	23	23	20.75	569	577	562	561	567.25	0.041	0.045	0.034	0.034	0.0385	8	7	8	8	7.75
2021-08-03	11:19:00	3	2	1	515	515	515	515	515	25.06	25.08	25.11	25.14	25.0975	46.53	46.52	49.45	46.35	47.2125	0.2	0.2	0.3	0.3	0.25	2	2	2	2	2	6	6	6	6	6	528	534	530	531	530.75	0.017	0.021	0.021	0.021	0.02	9	15	13	9	11.5
														#DIV/0!					#DIV/0!																				#DIV/0!
														#DIV/0!					#DIV/0!																				#DIV/0!
[truncated: 279 more columns]
